# Supplementary material
Source: Research Square preprint supplement (doi:10.21203/rs.3.rs-9522580/v1)
Supplement: Supplementary file 1 [file 454f7a5dcf5daa9a51affcd5.docx]

**Supplementary Table 1.** The primers of targeted genes included in the study.

| Target gene | Forward/reverse (F/R) | Primer sequence | Product length (bp) |
| --- | --- | --- | --- |
| *CXCL8* | F | TCTGCAGCTCTGTGTGAAGG | 94 |
| R | TGGGGTGGAAAGGTTTGGAG | 94 |
| *HDAC3* | F | AGGCCTCCCAACATGACATG | 170 |
| R | TGTGTAACGCGAGCAGAACT | 170 |
| *β-actin* | F | CAGTGGCAAAGTGGAGATTGTTG | 169 |
| R | TCGCTCCTGGAAGATGGTGAT | 169 |

CXCL8: C-X-C motif chemokine ligand 8; HDAC3: histone deacetylase 3.
